# Supplementary material
Source: ML conference proceedings conference paper supplement (https://openreview.net/forum?id=cAaTbLa3ad)
Supplement: supplementary_material [file attachment]

---

# Supplementary Material for Estimating the Rate-Distortion Function by Wasserstein Gradient Descent

---

Anonymous Author(s)

Affiliation

Address

email

1 We review probability theory background and explain our notation from the main text in Section 1,  
2 elaborate on the connections between the R-D estimation problem and variational inference/learning  
3 in Section 2, give proofs of formal results for Wasserstein gradient descent in Section 3, provide  
4 an example implementation in Section 4 (the full implementation can be found in the zip file), and  
5 finally provide additional experimental results and details in Section 5.

## 6 1 Notions from probability theory

7 In this section we collect notions of probability theory used in the main text. See, e.g., [Çinlar, 2011]  
8 or [Folland, 1999] for more background.

9 **Marginal and conditional distributions.** The source and reproduction spaces  $\mathcal{X}, \mathcal{Y}$  are equipped  
10 with sigma-algebras  $\mathcal{A}_{\mathcal{X}}$  and  $\mathcal{A}_{\mathcal{Y}}$ , respectively. Let  $\mathcal{X} \times \mathcal{Y}$  denote the product space equipped with  
11 the product sigma algebra  $\mathcal{A}_{\mathcal{X}} \otimes \mathcal{A}_{\mathcal{Y}}$ . For any probability measure  $\pi$  on  $\mathcal{X} \times \mathcal{Y}$ , its first **marginal** is

$$\pi_1(A) := \pi(A \times \mathcal{Y}), \quad A \in \mathcal{A}_{\mathcal{X}},$$

12 which is a probability measure on  $\mathcal{X}$ . When  $\pi$  is the distribution of a random vector  $(X, Y)$ , then  $\pi_1$   
13 is the distribution of  $X$ . The second marginal of  $\pi$  is defined analogously as

$$\pi_2(B) := \pi(\mathcal{X} \times B), \quad B \in \mathcal{A}_{\mathcal{Y}}.$$

14 A Markov **kernel** or **conditional distribution**  $K(x, dy)$  is a map  $\mathcal{X} \times \mathcal{A}_{\mathcal{Y}} \rightarrow [0, 1]$  such that

- 15 1.  $K(x, \cdot)$  is a probability measure on  $\mathcal{Y}$  for each  $x \in \mathcal{X}$ ;
- 16 2. the function  $x \mapsto K(x, B)$  is measurable for each set  $B \in \mathcal{A}_{\mathcal{Y}}$ .

17 When speaking of the conditional distribution of a random variable  $Y$  given another random vari-  
18 able  $X$ , we occasionally also use the notation  $Q_{Y|X}$  from information theory [Polyanskiy and Wu,  
19 2014]. Then,  $Q_{Y|X=x}(B) = K(x, B)$  is the conditional probability of the event  $\{Y \in B\}$  given  
20  $X = x$ .

21 Suppose that a probability measure  $\mu$  on  $\mathcal{X}$  is given, in addition to a kernel  $K(x, dy)$ . Together they  
22 define a unique measure  $\mu \otimes K$  on the product space  $\mathcal{X} \times \mathcal{Y}$ . For a rectangle set  $A \times B \in \mathcal{A}_{\mathcal{X}} \otimes \mathcal{A}_{\mathcal{Y}}$ ,

$$\mu \otimes K(A \times B) = \int_A \mu(dx) K(x, B), \quad A \in \mathcal{A}_{\mathcal{X}}, B \in \mathcal{A}_{\mathcal{Y}}.$$

23 The measure  $\pi := \mu \otimes K$  has first marginal  $\pi_1 = \mu$ .

24 The classic product measure is a special case of this construction. Namely, when a measure  $\nu$  on  $\mathcal{Y}$  is  
25 given, using the constant kernel  $K(x, dy) := \nu(dy)$  (which does not depend on  $x$ ) gives rise to the  
26 product measure  $\mu \otimes \nu$ ,

$$\mu \otimes \nu(A \times B) = \mu(A)\nu(B), \quad A \in \mathcal{A}_{\mathcal{X}}, B \in \mathcal{A}_{\mathcal{Y}}.$$

Table 1: Guide to notation and their interpretations in various problem domains. “LVM” stands for latent variable modeling, “NPMLE” stands for non-parametric MLE. The R-D problem (3) is equivalent to a “projection” problem in entropic optimal transport (discussed in Sec. 2.2) and statistical problems involving maximum-likelihood estimation (see discussion in Sec. 2.3 and below).

| Context       | $\mu = P_X$         | $\rho(x, y)$         | $K = Q_{Y X}$         | $\nu = Q_Y$           |
|---------------|---------------------|----------------------|-----------------------|-----------------------|
| OT            | source distribution | transport cost       | “transport plan”      | target distribution   |
| R-D           | data distribution   | distortion criterion | compression algorithm | codebook distribution |
| LVM/NPMLE     | data distribution   | “ $-\log p(x y)$ ”   | variational posterior | prior distribution    |
| deconvolution | noisy measurements  | “noise kernel”       | —                     | noiseless model       |

Under mild conditions (for instance when  $\mathcal{X}, \mathcal{Y}$  are Polish spaces equipped with their Borel sigma algebras, as in the main text), any probability measure  $\pi$  on  $\mathcal{X} \times \mathcal{Y}$  is of the above form. Namely, the **disintegration** theorem asserts that  $\pi$  can be written as  $\pi = \pi_1 \otimes K$  for some kernel  $K$ . When  $\pi$  is the joint distribution of a random vector  $(X, Y)$ , this says that there is a measurable version of the conditional distribution  $Q_{Y|X}$ .

**Optimal transport.** Given a measure  $\mu$  on  $\mathcal{X}$  and a measurable function  $T : \mathcal{X} \rightarrow \mathcal{Y}$ , the **pushforward** (or image measure) of  $\mu$  under  $T$  is a measure on  $\mathcal{Y}$ , given by

$$T_{\#}\mu(B) = \mu(T^{-1}(B)), \quad B \in \mathcal{A}_{\mathcal{Y}}.$$

If  $T$  is seen as a random variable and  $\mu$  as the baseline probability measure, then  $T_{\#}\mu$  is simply the distribution of  $T$ .

Suppose that  $\mu$  and  $\nu$  are probability measures on  $\mathcal{X} = \mathcal{Y} = \mathbb{R}^d$  with finite second moment. As introduced in the main text,  $\Pi(\mu, \nu)$  denotes the set of couplings, i.e., measures  $\pi$  on  $\mathcal{X} \times \mathcal{Y}$  with  $\pi_1 = \mu$  and  $\pi_2 = \nu$ . The 2-Wasserstein distance  $W_2(\mu, \nu)$  between  $\mu$  and  $\nu$  is defined as

$$W_2(\mu, \nu) = \left( \inf_{\pi \in \Pi(\mu, \nu)} \int \|y - x\|^2 \pi(dx, dy) \right)^{1/2}.$$

This indeed defines a metric on the space of probability measures with finite second moment.

## 2 R-D estimation and variational inference/learning

In this section, we give a more detailed explanation of how the the R-D problem (3) relates to variational inference and learning in latent variable models.

To facilitate the discussion and make clearer the connections, we adopt notation more common in statistics and information theory. Table 1 summarizes the notation and the correspondence to the measure-theoretic notation used in the main text.

In statistical modeling, the goal is to fit a density  $\hat{p}(x)$  to the true (unknown) data distribution  $P_X$ . Consider specifying  $\hat{p}(x)$  as a latent variable model, where  $\mathcal{Y}$  takes on the role of a latent space, and  $Q_Y = \nu$  is the distribution of a latent variable  $Y$  (which may encapsulate the model parameters). As we shall see, the optimization objective defining the rate functional (5) corresponds to an aggregate Evidence Lower Bound (ELBO) [Blei et al., 2017]. Thus, computing the rate functional corresponds to variational inference [Blei et al., 2017] in a given model (see Sec. 2.2), and the parametric R-D estimation problem, i.e.,

$$\inf_{\nu \in \mathcal{H}} \mathcal{L}_{BA}(\nu),$$

is equivalent to estimating a model using the variational EM algorithm [Beal and Ghahramani, 2003] (see Sec. 2.3). The variational EM algorithm can be seen as a restricted version of the BA algorithm (see Sec. 2.3), whereas the EM algorithm [Dempster et al., 1977] shares its E-step with the BA algorithm but can differ in its M-step (see Sec. 2.4).

### 2.1 Setup

For concreteness, fix a reference measure  $\zeta$  on  $\mathcal{Y}$ , and suppose  $Q_Y$  has density  $q(y)$  w.r.t.  $\zeta$ . Often the latent space  $\mathcal{Y}$  is a Euclidean space, and  $q(y)$  is the usual probability density function w.r.t. the

60 Lebesgue measure  $\zeta$ ; or when the latent space is discrete/countable,  $\zeta$  is the counting measure and  $q(y)$   
61 is the usual probability mass function. We will consider the typical parametric estimation problem and  
62 choose a particular parametric form for  $Q_Y$  indexed by a parameter vector  $\theta$ . This defines a parametric  
63 family  $\mathcal{H} = \{Q_Y^\theta : \theta \in \Theta\}$  for some parameter space  $\Theta$ . Finally, suppose the distortion function  $\rho$   
64 induces a conditional likelihood density,  $p(x|y) \propto e^{-\lambda\rho(x,y)}$ , with a normalization constant that has  
65 no  $y$ -dependence.

66 A latent variable model is then specified by the joint density  $q(y)p(x|y)$ . We use it to posit a density  
67 for the data by

$$\hat{p}(x) = \int_{\mathcal{Y}} p(x|y) dQ_Y(y) = \int_{\mathcal{Y}} p(x|y) q(y) \zeta(dy). \quad (16)$$

68 As a simple example, a Gaussian mixture model with isotropic component variances can be specified  
69 as follows. Let  $Q_Y$  be a mixing distribution on  $\mathcal{X} = \mathcal{Y} = \mathbb{R}^d$  parameterized by component weights  
70  $w_1, \dots, w_K$  and locations  $\mu_1, \dots, \mu_K$ , such that  $Q_Y = \sum_{k=1}^K w_k \delta_{\mu_k}$ . Let  $p(x|y) = \mathcal{N}(y, \sigma^2)$  be a conditional  
71 Gaussian density with mean  $y$  and variance  $\sigma^2$ . Now formula (16) gives the usual Gaussian mixture  
72 density on  $\mathbb{R}^d$ .

73 Maximum-likelihood estimation then ideally maximizes the population log (marginal) likelihood,

$$\mathbb{E}_{x \sim P_X} [\log \hat{p}(x)] = \int \log \hat{p}(x) P_X(dx) = \int \log \left( \int_{\mathcal{Y}} p(x|y) dQ_Y(y) \right) P_X(dx). \quad (17)$$

74 To deal with the often intractable marginal likelihood in the inner integral, we turn to variational  
75 inference and learning [Jordan et al., 1999, Wainwright et al., 2008].

## 76 2.2 Connection to variational inference

77 Given a latent variable model and any data observation  $x$ , a central task in Bayesian statistics is to  
78 infer the Bayesian posterior [Jordan, 1999], which we formally view as a conditional distribution  
79  $Q_{Y|X=x}^*$ . It is given by

$$\frac{dQ_{Y|X=x}^*(y)}{dQ_Y(y)} = \frac{p(x|y)}{\hat{p}(x)},$$

80 or, using the density  $q(y)$  of  $Q_Y$ , given by the following conditional density via the familiar Bayes'  
81 rule,

$$q^*(y|x) = \frac{p(x|y)q(y)}{\hat{p}(x)} = \frac{p(x|y)q(y)}{\int_{\mathcal{Y}} p(x|y)q(y)\zeta(dy)}.$$

82 Unfortunately, the true Bayesian posterior is typically intractable, as the (marginal) data likelihood  
83 in the denominator involves an often high-dimensional integral. Variational inference [Jordan et al.,  
84 1999, Wainwright et al., 2008] therefore aims to approximate the true posterior by a variational  
85 distribution  $Q_{Y|X=x} \in \mathcal{P}(\mathcal{Y})$  by minimizing their relative divergence  $H(Q_{Y|X=x}|Q_{Y|X=x}^*)$ . The  
86 problem is equivalent to maximizing the following lower bound on the marginal log-likelihood,  
87 known as the Evidence Lower BOund (ELBO) [Blei et al., 2017]:

$$\begin{aligned} \arg \min_{Q_{Y|X=x}} H(Q_{Y|X=x}|Q_{Y|X=x}^*) &= \arg \max_{Q_{Y|X=x}} \text{ELBO}(Q_Y, x, Q_{Y|X=x}), \\ \text{ELBO}(Q_Y, x, Q_{Y|X=x}) &= \mathbb{E}_{y \sim Q_{Y|X=x}} [\log p(x|y)] - H(Q_{Y|X=x}|Q_Y) \\ &= \log \hat{p}(x) - H(Q_{Y|X=x}|Q_{Y|X=x}^*). \end{aligned} \quad (18)$$

88 Translating the definition of the rate functional (5) into the present scenario,

$$\begin{aligned} \mathcal{L}_{BA}(Q_Y) &= \inf_{Q_{Y|X}} \mathbb{E}_{x \sim P_X, y \sim Q_{Y|X=x}} [-\log p(x|y)] + \mathbb{E}_{x \sim P_X} [H(Q_{Y|X=x}|Q_Y)] + \text{const} \\ &= \inf_{Q_{Y|X}} \mathbb{E}_{x \sim P_X} [-\text{ELBO}(Q_Y, x, Q_{Y|X=x})] + \text{const}, \end{aligned} \quad (19)$$

89 we recognize that the rate functional optimizes the population ELBO, and this optimization problem  
90 decouples over  $x$  and can be solved by the variational inference problem (18) involving  $Q_{Y|X=x}$ .  
91 At optimality,  $Q_{Y|X} = Q_{Y|X}^*$ , the ELBO (18) is tight and recovers  $\log \hat{p}(x)$ , and the rate functional  
92 takes on the form of a (negated) population marginal log likelihood (17), as given earlier by (6) in  
93 Sec. 2.1.

## 94 2.3 Connection to variational EM

95 The discussion so far concerns *probabilistic inference*, where a latent variable model  $(Q_Y, p(x|y))$   
 96 has been given and we saw that computing the rate functional amounts to variational inference.  
 97 Suppose now we wish to *learn* a model from data. The R-D problem (4) then corresponds to model  
 98 estimation using the variational EM algorithm [Beal and Ghahramani, 2003].

99 To estimate a latent variable model by (approximate) maximum-likelihood, the variational EM  
 100 algorithm maximizes the population ELBO

$$\mathbb{E}_{x \sim P_X} [\text{ELBO}(Q_Y, x, Q_{Y|X=x})] = \mathbb{E}_{x \sim P_X, y \sim Q_{Y|X=x}} [\log p(x|y)] - \mathbb{E}_{x \sim P_X} [H(Q_{Y|X=x}|Q_Y)], \quad (20)$$

101 w.r.t.  $Q_Y$  and  $Q_{Y|X}$ . This precisely corresponds to the R-D problem  $\inf_{Q_Y \in \mathcal{H}} \mathcal{L}_{BA}(Q_Y)$ , using the  
 102 form of  $\mathcal{L}_{BA}(Q_Y)$  from (19).

103 In popular implementations of variational EM such as the VAE [Kingma and Welling, 2013],  $Q_Y$  and  
 104  $Q_{Y|X}$  are restricted to parametric families. When they are allowed to range over all of  $\mathcal{P}(\mathcal{Y})$  and all  
 105 conditional distributions, variational EM then becomes equivalent to the BA algorithm.

## 106 2.4 The Blahut–Arimoto and EM algorithms

107 The BA and EM algorithms share the same objective function, namely the negative of the population  
 108 ELBO from (20). Both also perform coordinate descent / alternating projection, but they define the  
 109 coordinates slightly differently — the BA algorithm uses  $(Q_{Y|X}, Q_Y)$  with  $Q_Y \in \mathcal{P}(\mathcal{Y})$ , whereas  
 110 the EM algorithm uses  $(Q_{Y|X}, \theta)$  with  $\theta$  indexing a parametric family  $\mathcal{H} = \{Q_Y^\theta : \theta \in \Theta\}$ . Thus  
 111 the coordinate update w.r.t.  $Q_{Y|X}$  (the “E-step”) is the same in both algorithms, but the subsequent  
 112 “M-step” potentially differs depending on the role of  $\theta$ .

113 Given the optimization objective,

$$\mathbb{E}_{x \sim P_X, y \sim Q_{Y|X=x}} [-\log p(x|y)] + H(P_X Q_{Y|X} | P_X \otimes Q_Y),$$

114 both the BA and EM algorithms optimize the transition kernel  $Q_{Y|X}$  the same way in the E-step, as

$$\frac{dQ_{Y|X=x}^*}{dQ_Y}(y) = \frac{p(x|y)}{p(x)}. \quad (21)$$

115 For the M-step, the BA algorithm performs

$$\min_{Q_Y \in \mathcal{P}(\mathcal{Y})} H(P_X Q_{Y|X}^*; P_X \otimes Q_Y),$$

116 whereas the EM algorithm minimizes the full objective w.r.t. the parameters  $\theta$  of  $Q_Y$ ,

$$\min_{\theta \in \Theta} \mathbb{E}_{(x,y) \sim P_X Q_{Y|X}^*} [-\log p(x|y)] + H(P_X Q_{Y|X}^*; P_X \otimes Q_Y). \quad (22)$$

117 The difference comes from the fact that when we parameterize  $Q_Y$  by  $\theta$  in the parameter estimation  
 118 problem,  $Q_{Y|X}^*$  — and consequently both terms in the objective of (22) — will have functional  
 119 dependence on  $\theta$  through the E-step optimality condition (21).

120 In the Gaussian mixture example,  $Q_Y = \sum_{k=1}^K w_k \delta_{\mu_k}$ , and its parameters  $\theta$  consist of the components  
 121 weights  $(w_1, \dots, w_K) \in \Delta^{d-1}$  and location vectors  $\{\mu_1, \dots, \mu_K\} \subset \mathbb{R}^d$ . The E-step computes  
 122  $Q_{Y|X=x}^* = \sum_k w_k \frac{p(x|\mu_k)}{p(x)} \delta_{\mu_k}$ . For the M-step, if we regard the locations as known so that  $\theta =$   
 123  $(w_1, \dots, w_K)$  only consists of the weights, then the two algorithms perform the same update; however  
 124 if  $\theta$  also includes the locations, then the M-step of the EM algorithm will not only update the weights as  
 125 in the BA algorithm, but also the locations, due to the distortion term  $\mathbb{E}_{(x,y) \sim P_X Q_{Y|X}^*} [-\log p(x|y)] =$   
 126  $-\int \sum_k w_k \frac{p(x|\mu_k)}{p(x)} \log p(x|\mu_k) P_X(dx)$ .

## 127 3 Wasserstein gradient descent

### 128 3.1 Wasserstein gradient for the rate functional

129 Below we compute the Wasserstein gradient of  $\mathcal{L}_{BA}(\nu) = \int -\log \int \exp(-\lambda \rho(x, y)) \nu(dy) \mu(dx)$ .  
 130 Under sufficient integrability on  $\mu$  and  $\nu$  to exchange the order of limit and integral, we can calculate

131 the first variation as

$$\begin{aligned} \lim_{\varepsilon \rightarrow 0} \frac{\mathcal{L}((1-\varepsilon)\nu + \varepsilon\tilde{\nu}) - \mathcal{L}(\nu)}{\varepsilon} &= - \int \lim_{\varepsilon \rightarrow 0} \frac{1}{\varepsilon} \log \left[ \frac{\int \exp(-\lambda\rho(x, y))(\nu + \varepsilon(\tilde{\nu} - \nu))(dy)}{\int \exp(-\lambda\rho(x, y))\nu(dy)} \right] \mu(dx) \\ &= - \int \lim_{\varepsilon \rightarrow 0} \frac{1}{\varepsilon} \log \left[ 1 + \frac{\int \exp(-\lambda\rho(x, y))\varepsilon(\tilde{\nu} - \nu)(dy)}{\int \exp(-\lambda\rho(x, y))\nu(dy)} \right] \mu(dx) \\ &= \iint - \frac{\exp(-\lambda\rho(x, y))}{\int \exp(-\lambda\rho(x, \tilde{y}))\nu(d\tilde{y})} \mu(dx) (\tilde{\nu} - \nu)(dy), \end{aligned}$$

132 where the last equality uses  $\lim_{\varepsilon \rightarrow 0} \frac{1}{\varepsilon} \log(1 + \varepsilon x) = x$  and Fubini's theorem. Thus the first variation  
133  $\psi^\nu$  of  $\mathcal{L}_{BA}$  at  $\nu$  is

$$\psi^\nu(y) = \int - \frac{\exp(-\lambda\rho(x, y))}{\int \exp(-\lambda\rho(x, \tilde{y}))\nu(d\tilde{y})} \mu(dx). \quad (23)$$

134 To find the desired Wasserstein gradient of  $\mathcal{L}_{BA}$ , it remains to take the Euclidean gradient of  $\psi^\nu$ , i.e.,  
135  $\nabla \mathcal{L}_{BA}(\nu) = \nabla \psi^\nu$ .

### 136 3.2 Proof of Lemma 4.2 (convergence of Wasserstein gradient descent)

137 We first provide an auxiliary result.

138 **Lemma 3.1.** *Let  $\gamma_1 \geq \gamma_2 \geq \dots \geq 0$  and  $a_t \geq 0$ ,  $t \in \mathbb{N}$ ,  $C > 0$  satisfy  $\sum_{t=1}^{\infty} \gamma_t = \infty$ ,  $\sum_{t=1}^{\infty} \gamma_t^2 < \infty$ ,  $\sum_{t=1}^{\infty} a_t \gamma_t < \infty$  and  $|a_t - a_{t+1}| \leq C\gamma_t$  for all  $t \in \mathbb{N}$ . Then  $\lim_{t \rightarrow \infty} a_t = 0$ .*

140 *Proof.* The conclusion remains unchanged when rescaling  $a_t$  by the constant  $C$ , and thus without  
141 loss of generality  $C = 1$ .

142 Clearly  $\gamma_t \rightarrow 0$  as  $\sum_{t=1}^{\infty} \gamma_t^2 < \infty$ . Moreover, there exists a subsequence of  $(a_t)_{t \in \mathbb{N}}$  which converges  
143 to zero (otherwise there exists  $\delta > 0$  such that  $a_t \geq \delta > 0$  for all but finitely many  $t$ , contradicting  
144  $\sum_{t=1}^{\infty} \gamma_t a_t < \infty$ ).

145 Arguing by contradiction, suppose that the conclusion fails, i.e., that there exists a subsequence of  
146  $(a_t)_{t \in \mathbb{N}}$  which is uniformly bounded away from zero, say  $a_t \geq \delta > 0$  along that subsequence. Using  
147 this subsequence and the convergent subsequence mentioned above, we can construct a subsequence  
148  $a_{i_1}, a_{i_2}, a_{i_3}, \dots$  where  $a_{i_n} \approx 0$  for  $n$  odd and  $a_{i_n} \geq \delta$  for  $n$  even. We will show that

$$\sum_{t=i_{2n-1}}^{i_{2n}} a_t \gamma_t \gtrsim \delta^2/2 \quad \text{for all } n \in \mathbb{N},$$

149 contradicting the finiteness of  $\sum_t \gamma_t a_t$ . (The notation  $\approx (\gtrsim)$  indicates (in)equality up to additive  
150 terms converging to zero for  $n \rightarrow \infty$ .)

151 To ease notation, fix  $n$  and set  $m = i_{2n-1}$  and  $M = i_{2n}$ . We show that  $\sum_{t=m}^M a_t \gamma_t \gtrsim \delta^2/2$ . To this  
152 end, using  $|a_t - a_{t+1}| \leq \gamma_t$  we find

$$a_t \geq a_M - \sum_{j=k}^{M-1} \gamma_j \geq \delta - \sum_{j=k}^{M-1} \gamma_j.$$

153 Since  $a_m \approx 0$ , there exists a largest  $n_0 \in \mathbb{N}$ ,  $n_0 \geq m$ , such that  $\sum_{j=n_0}^{M-1} \gamma_j \gtrsim \delta$  (and thus  
154  $\sum_{j=n_0}^{M-1} \gamma_j \lesssim \delta - \gamma_{n_0} \approx \delta$  as well). We conclude

$$\begin{aligned} \sum_{t=m}^M \gamma_t a_t &\geq \sum_{t=n_0}^M \gamma_t a_t \geq \sum_{t=n_0}^M \gamma_t \left( \delta - \sum_{j=k}^{M-1} \gamma_j \right) \gtrsim \delta^2 - \sum_{t=n_0}^M \sum_{j=n_0}^M \gamma_t \gamma_j \mathbf{1}_{\{j \geq k\}} \\ &= \delta^2 - \frac{1}{2} \left( \sum_{t=n_0}^M \gamma_t \right)^2 - \frac{1}{2} \sum_{t=n_0}^M \gamma_t^2 \approx \delta^2/2, \end{aligned}$$

155 where we used that  $\sum_{t=n_0}^M \gamma_t^2 \approx 0$ . This completes the proof.  $\square$

156 *Proof of Lemma 4.2.* Using the linear approximation property in (15), we calculate

$$\begin{aligned}\mathcal{L}(\nu^{(n)}) - \mathcal{L}(\nu^{(0)}) &= \sum_{t=0}^{n-1} \mathcal{L}(\nu^{(t+1)}) - \mathcal{L}(\nu^{(t)}) \\ &= \sum_{t=0}^{n-1} -\gamma_t \int \|\nabla V_{\mathcal{L}}(\nu^{(t)})\|^2 d\nu^{(t)} + \gamma_t^2 o\left(\int \|\nabla V_{\mathcal{L}}(\nu^{(t)})\|^2 d\nu^{(t)}\right).\end{aligned}$$

157 As  $\mathcal{L}(\nu^{(0)})$  is finite and  $\mathcal{L}(\nu^{(n)})$  is bounded from below, it follows that

$$\sum_{t=0}^{\infty} \gamma_t \int \|\nabla V_{\mathcal{L}}(\nu^{(t)})\|^2 d\nu^{(t)} < \infty.$$

158 The claim now follow by applying Lemma 3.1 with  $a_t = \int \|\nabla \psi^{\nu^{(t)}}\|^2 d\nu^{(t)}$ ; note that the assumption  
159 in the lemma is satisfied due to the second inequality in (15).  $\square$

### 160 3.3 Proof of Proposition 4.3 (sample complexity)

161 Recall that  $\mathcal{X} = \mathcal{Y} = \mathbb{R}^d$  and  $\rho(x, y) = \|x - y\|^2$  in this proposition. For the proof, we will need the  
162 following lemma which is of independent interest. We write  $\nu \leq_c \mu$  if  $\nu$  is dominated by  $\mu$  in convex  
163 order, i.e.,  $\int f d\nu \leq \int f d\mu$  for all convex functions  $f : \mathbb{R}^d \rightarrow \mathbb{R}$ .

164 **Lemma 3.2.** *Let  $\mu$  have finite second moment. Given  $\nu \in \mathcal{P}(\mathbb{R}^d)$ , there exists  $\tilde{\nu} \in \mathcal{P}(\mathbb{R}^d)$  with  
165  $\tilde{\nu} \leq_c \mu$  and*

$$\mathcal{L}_{EOT}(\mu, \tilde{\nu}) \leq \mathcal{L}_{EOT}(\mu, \nu).$$

166 *This inequality is strict if  $\nu \not\leq_c \mu$ . In particular, any optimizer  $\nu^*$  of (8) satisfies  $\nu^* \leq_c \mu$ .*

167 *Proof.* Because this proof uses disintegration over  $\mathcal{Y}$ , it is convenient to reverse the order of the  
168 spaces in the notation and write a generic point as  $(x, y) \in \mathcal{Y} \times \mathcal{X}$ . Consider  $\pi \in \Pi(\nu, \mu)$  and its  
169 disintegration  $\pi = \nu(dx) \otimes K(x, dy)$  over  $x \in \mathcal{Y}$ . Define  $T : \mathbb{R}^d \rightarrow \mathbb{R}^d$  by

$$T(x) := \int y K(x, dy).$$

170 Define also  $\tilde{\pi} := (T, \text{id})_{\#} \pi$  and  $\tilde{\nu} := \tilde{\pi}_1$ . From the definition of  $T$ , we see that  $\tilde{\pi}$  is a martingale,  
171 thus  $\tilde{\nu} \leq_c \mu$ . Moreover,  $\tilde{\nu} \otimes \mu = (T, \text{id})_{\#} \nu \otimes \mu$ . The data-processing inequality now shows that

$$H(\tilde{\pi} | \tilde{\nu} \otimes \mu) \leq H(\pi | \nu \otimes \mu).$$

172 On the other hand,  $\int \int \tilde{y} K(x, d\tilde{y}) - y\|^2 K(x, dy) \leq \int \|x - y\|^2 K(x, dy)$  since the barycenter  
173 minimizes the squared distance, and this inequality is strict whenever  $x \neq \int \tilde{y} K(x, d\tilde{y})$ . Thus

$$\int \|x - y\|^2 \tilde{\pi}(dx, dy) \leq \int \|x - y\|^2 \pi(dx, dy),$$

174 and the inequality is strict unless  $T(x) = x$  for  $\nu$ -a.e.  $x$ , which in turn is equivalent to  $\pi$  being a  
175 martingale. The claims follow.  $\square$

176 *Proof of Proposition 4.3.* Subgaussianity of the optimizer follows directly from Lemma 3.2.

177 Recalling that  $\inf_{\nu} \mathcal{L}_{EOT}(\nu)$  and  $\inf_{\nu} \lambda^{-1} \mathcal{L}_{BA}(\nu)$  have the same values and minimizers, it suffices  
178 to show the claim for  $\mathcal{L} = \mathcal{L}_{EOT}$ . Let  $\nu^*$  be an optimizer of (8) and  $\nu^n$  its empirical measure from  $n$   
179 samples, then clearly

$$\begin{aligned}\left| \min_{\nu_n \in \mathcal{P}_n(\mathbb{R}^d)} \mathcal{L}_{EOT}(\mu, \nu_n) - \min_{\nu \in \mathcal{P}(\mathbb{R}^d)} \mathcal{L}_{EOT}(\mu, \nu) \right| &= \min_{\nu_n \in \mathcal{P}_n(\mathbb{R}^d)} \mathcal{L}_{EOT}(\mu, \nu_n) - \min_{\nu \in \mathcal{P}(\mathbb{R}^d)} \mathcal{L}_{EOT}(\mu, \nu) \\ &\leq \mathbb{E} [\|\mathcal{L}_{EOT}(\mu, \nu^n) - \mathcal{L}_{EOT}(\mu, \nu^*)\|]\end{aligned}$$

180 where the expectation is taken over samples for  $\nu^n$ . The first inequality of Proposition 4.3 now  
181 follows from the sample complexity result for entropic optimal transport in [Mena and Niles-Weed,  
182 2019, Theorem 2].

183 Denote by  $\nu_m^*$  the optimizer for the problem (8) with  $\mu$  replaced by  $\mu^m$ . Similarly to the above, we  
 184 obtain

$$\mathbb{E} \left[ \left| \min_{\nu \in \mathcal{P}(\mathbb{R}^d)} \mathcal{L}_{EOT}(\mu, \nu) - \min_{\nu \in \mathcal{P}(\mathbb{R}^d)} \mathcal{L}_{EOT}(\mu^m, \nu) \right| \right] \\ \leq \mathbb{E} \left[ \max_{\nu \in \{\nu^*, \nu_m^*\}} |\mathcal{L}_{EOT}(\mu, \nu) - \mathcal{L}_{EOT}(\mu^m, \nu)| \right],$$

185 where the expectation is taken over samples from  $\mu^m$ . In this situation, we cannot directly apply  
 186 [Mena and Niles-Weed, 2019, Theorem 2]. However, the bound given by [Mena and Niles-Weed,  
 187 2019, Proposition 2] still applies, and the only dependence on  $\nu \in \{\nu^*, \nu_m^*\}$  is through their  
 188 subgaussianity constants. By Lemma 3.2, these constants are bounded by the corresponding constants  
 189 of  $\mu$  and  $\mu^m$ . Thus, the arguments in the proof of [Mena and Niles-Weed, 2019, Theorem 2] can be  
 190 applied, yielding the second inequality of Proposition 4.3.

191 The final inequality of Proposition 4.3 follows from the first two inequalities (the first one being  
 192 applied with  $\mu^m$ ) and the triangle inequality, where we again use the arguments in the proof of  
 193 [Mena and Niles-Weed, 2019, Theorem 2] to bound the expectation over the subgaussianity constants  
 194 of  $\mu^m$ .  $\square$

## 195 4 Example implementation of WGD

196 We provide a self-contained minimal implementation of Wasserstein gradient descent on  $\mathcal{L}_{BA}$ , using  
 197 the Jax library [Bradbury et al., 2018]. To compute the Wasserstein gradient, we evaluate the first  
 198 variation of the rate functional in `compute_psi_sum` according to (23), yielding  $\sum_{i=1}^n \psi^\nu(x_i)$ , then  
 199 simply take its gradient w.r.t. the particle locations  $x_{1,\dots,n}$  using Jax’s autodiff tool on line 51.

200 The implementation of WGD on  $\mathcal{L}_{EOT}$  is similar, except the first variation is computed using  
 201 Sinkhorn’s algorithm. Both versions can be easily just-in-time compiled and enjoy GPU acceleration.

```

1  # Wasserstein GD on the rate functional L_{BA}.
2  import jax.numpy as jnp
3  import jax
4  from jax.scipy.special import logsumexp
5
6  # Define the distortion function \rho.
7  squared_diff = lambda x, y: jnp.sum((x - y) ** 2)
8  pairwise_distortion_fn = jax.vmap(jax.vmap(squared_diff, (None, 0)), (0, None))
9
10
11 def wgrad(mu_x, mu_w, nu_x, nu_w, rd_lambda):
12     """
13     Compute the Wasserstein gradient of the rate functional, which we will use
14     to move the \nu particles.
15     :param mu_x: locations of \mu atoms.
16     :param mu_w: weights of \mu atoms.
17     :param nu_x: locations of \nu atoms.
18     :param nu_w: weights of \nu atoms.
19     :param rd_lambda: R-D tradeoff hyperparameter.
20     :return:
21     """
22
23     def compute_psi_sum(nu_x):
24         """
25         Here we compute a surrogate loss based on the first variation \psi, which
26         allows jax autodiff to compute the desired Wasserstein gradient.
27         :param nu_x:
28         :return: psi_sum = \sum_i \psi(nu_x[i])
29         """
30         C = pairwise_distortion_fn(mu_x, nu_x)

```



```

31     scaled_C = rd_lambda * C # [m, n]
32     log_nu_w = jnp.log(nu_w) # [1, n]
33
34     # Solve BA inner problem with a fixed nu.
35     phi = - logsumexp(-scaled_C + log_nu_w, axis=1, keepdims=True) # [m, 1]
36     loss = jnp.sum(mu_w * phi) # Evaluate the rate functional. Eq (6) in paper.
37
38     # Let's also report rate and distortion estimates (discussed in Sec. 4.4 of the paper).
39     # Find  $\pi^*$  via  $\phi$ 
40     pi = jnp.exp(phi - scaled_C) * jnp.outer(mu_w, nu_w) # [m, n]
41     distortion = jnp.sum(pi * C)
42     rate = loss - rd_lambda * distortion
43
44     # Now evaluate  $\psi$  on the atoms of  $\nu$ .
45     phi = jax.lax.stop_gradient(phi)
46     psi = - jnp.sum(jnp.exp(jax.lax.stop_gradient(phi) - scaled_C) * mu_w, axis=0)
47     psi_sum = jnp.sum(psi) # For computing gradient w.r.t. each  $\nu_x$  atom.
48     return psi_sum, (loss, rate, distortion)
49
50     # Evaluate the Wasserstein gradient, i.e.,  $\nabla \psi$ , on  $\nu_x$ .
51     psi_prime, loss = jax.grad(compute_psi_sum, has_aux=True)(nu_x)
52     return psi_prime, loss
53
54
55 def wgd(X, n, rd_lambda, num_steps, lr, rng):
56     """
57     A basic demo of Wasserstein gradient descent on a discrete distribution.
58     :param X: a 2D array [N, d] of data points defining the source  $\mu$ .
59     :param n: the number of particles to use for  $\nu$ .
60     :param rd_lambda: R-D tradeoff hyperparameter.
61     :param num_steps: total number of gradient updates.
62     :param lr: step size.
63     :param rng: jax random key.
64     :return: ( $\nu_x$ ,  $\nu_w$ ), the locations and weights of the final  $\nu$ .
65     """
66     # Set up the source measure  $\mu$ .
67     m = jnp.size(X, 0)
68     mu_x = X
69     mu_w = 1 / m * jnp.ones((m, 1))
70     # Initialize  $\nu$  atoms using random training samples.
71     rand_idx = jax.random.permutation(rng, m)[:n]
72     nu_x = X[rand_idx] # Locations of  $\nu$  atoms.
73     nu_w = 1 / n * jnp.ones((1, n)) # Uniform weights.
74     for step in range(num_steps):
75         psi_prime, (loss, rate, distortion) = wgrad(mu_x, mu_w, nu_x, nu_w, rd_lambda)
76         nu_x -= lr * psi_prime
77         print(f'step={step}, loss={loss:.4g}, rate={rate:.4g}, distortion={distortion:.4g}')
78
79     return nu_x, nu_w
80
81
82 if __name__ == '__main__':
83     # Run a toy example on 2D Gaussian samples.
84     rng = jax.random.PRNGKey(0)
85     X = jax.random.normal(rng, [10, 2])
86     nu_x, nu_w = wgd(X, n=4, rd_lambda=2., num_steps=100, lr=0.1, rng=rng)

```



## 5 Further experimental results

Our deconvolution experiments were run on Intel(R) Xeon(R) CPUs, while the rest of the experiments were run on Titan RTX GPUs.

In most experiments, we use the Adam [Kingma and Ba, 2015] optimizer for updating the  $\nu$  particle locations in WGD and for updating the variational parameters in other methods. For our hybrid WGD algorithm, which adjusts the particle weights in addition to their locations, we found that applying momentum to the particle locations can in fact slow down convergence, and therefore use plain gradient descent with a decaying step size.

### 5.1 Deconvolution

**Loss curves and solutions from various methods.** In Figure 1 we plot both the training and test losses for the various methods. The test losses are evaluated on freshly drawn samples from the source distribution, and provide estimates of the true population losses. As expected, the train losses appear similar to the test losses since we use a large sample size for training.

In Figure 2, we visualize the fitted  $\nu$  measure after performing the optimization illustrated in Figure 1. We plot the location of the  $n = 20$  particles from the BA, WGD, and hybrid algorithms, additionally coloring the particles from BA and the hybrid algorithm by their weights. To visualize the (continuous)  $\nu$  learned by RD-VAE and NERD, we plot a scatter of 300 random samples drawn from each.

**Characterizing the optimal solution.** In the deconvolution problem,  $\mu = S * \mathcal{N}(0, \sigma^2 I)$ , and whenever  $\lambda \geq \frac{1}{\sigma^2}$  the optimal solution to the R-D problem (3) is given by  $\nu^* = S * \mathcal{N}(0, \sigma^2 - \frac{1}{\lambda})$  and  $K^*(x, dy) = \mathcal{N}(x, \frac{1}{\lambda})$ . This follows from a basic property of the Gaussian distribution and an argument based on characteristic functions.

Knowing the optimal  $\nu^*$ , we can therefore numerically compute the optimal loss,

$$OPT := \mathcal{L}_{BA}(\nu^*) = \int_{\mathcal{X}} -\log \left( \int_{\mathcal{Y}} e^{-\lambda \rho(x, y)} \nu^*(dy) \right) \mu(dx), \quad (24)$$

using the plug-in Monte Carlo estimator

$$\frac{1}{m} \sum_{i=1}^m -\log \left( \frac{1}{n} \sum_{j=1}^n e^{-\lambda \rho(x_i, y_j)} \right), \quad (25)$$

where  $x_{1, \dots, m}$  are drawn from  $\mu$  and  $y_{1, \dots, n}$  from  $\nu^*$ . To reduce the bias of this estimator (also discussed in the context of NERD in Sec. 3.2), we use  $m = 10000$  and the very large  $n = 10^6$  in our Monte-Carlo estimation above.

Similarly, we can sample  $\{(x_i, y_i)\}_{i=1}^m$  from  $\nu^* \otimes K^*$  to compute the ground truth distortion and rate with high accuracy as follows,

$$\begin{aligned} \mathcal{D} &= \frac{1}{m} \sum_{i=1}^m \rho(x_i, y_i), \\ \mathcal{R} &= OPT - \lambda \mathcal{D}. \end{aligned}$$

We can thus obtain the segment of the ground truth  $R(D)$  where  $\lambda \geq \frac{1}{\sigma^2}$ .

**R-D upper bounds.** We rerun the various algorithms with  $\lambda \in \{1, 3, 10, 30, 100, 300\}$  to produce upper bounds on  $R(D)$ , and plot the results in Figure 3-Right. We observe that WGD gives the tightest upper bound out of all the methods (the hybrid WGD algorithm produces overlapping curves and is omitted for clarity). As we increase  $n$  to 50 and 1000 (Figure 3-Middle, Left), the various methods increase linearly in their computational complexity (except for RD-VAE, which used a fixed architecture and didn't benefit noticeably from further increase in its neural network sizes), and eventually give qualitatively similar R-D upper bounds that generally agree with the true  $R(D)$ . Note that in large scale problems (e.g., those considered in Sec. 5.3), we are much more likely to operate in the "small  $n$ " regime due to computational constraints.

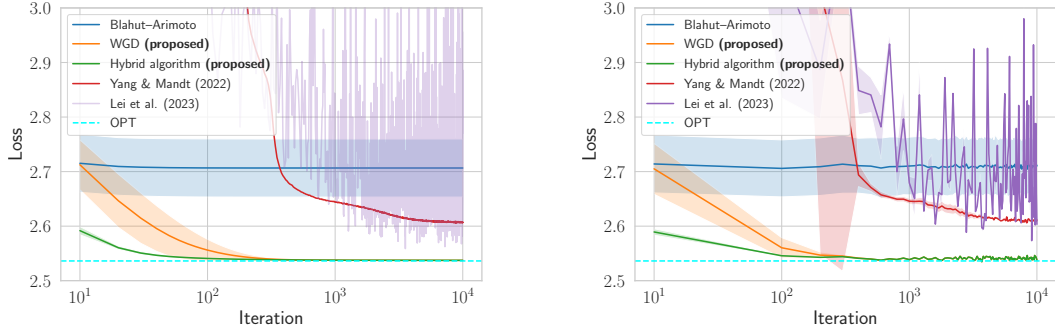

Figure 1: **Left:** The objective functions of the various methods across training iterations. **Right:** The same objective functions evaluated on random empirical measures of the source. The curve for each method is averaged over 5 reruns with different random seeds, with the shading corresponding to one standard deviation. The proposed WGD algorithms (orange, green) converge quickly to the theoretically optimal value  $OPT$  (cyan). BA [Blahut, 1972, Arimoto, 1972] (blue) converges quickly to a highly suboptimal solution, while the RD-VAE [Yang and Mandt, 2022] (red) converges more slowly, also to an inferior solution. NERD [Lei et al., 2023] (purple) fails to converge due to inaccuracy of its Monte-Carlo estimator when  $n$  is relatively small (see discussion in Sec. 3.2), leading to oscillating objective values.

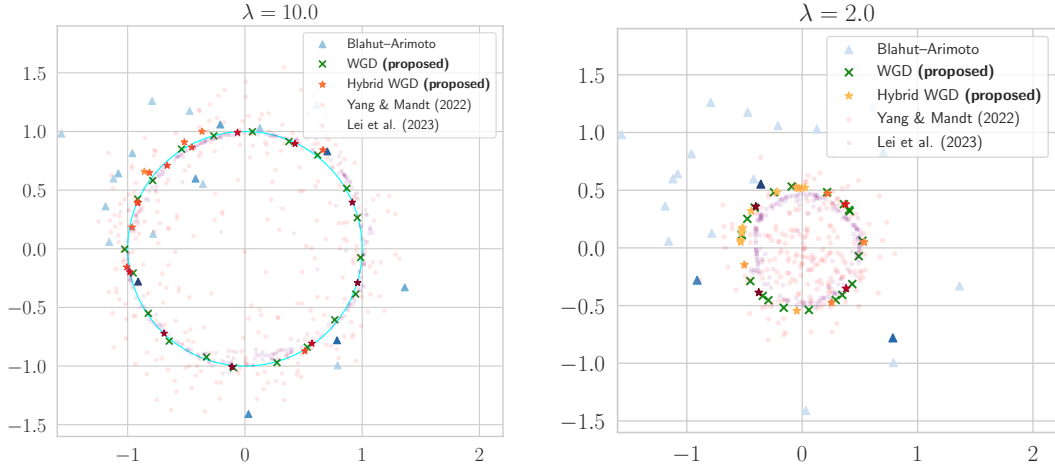

Figure 2: Visualizing the optimized  $\nu$  measures from various algorithms. **Left:**  $\lambda = 10 = \frac{1}{\sigma^2}$ , the same as in Fig. 1. Here  $\nu^*$  is precisely the uniform distribution on the unit circle, colored in cyan. The proposed WGD algorithm places almost all its  $\nu$  atoms (green crosses) exactly on the circle. The proposed hybrid algorithm occasionally places atoms off the circle, and assigns them lower weights (orange stars) than the ones on the circle (red stars). This extra flexibility explains its faster convergence compared to the plain WGD algorithm seen in Fig. 1, while achieving the same optimized loss close to  $OPT$ . The BA algorithm is stuck with the randomly initialized set of  $\nu$  atoms (blue) and can only manage to assign higher weights to atoms closer to the unit circle. RD-VAE and NERD have difficulty learning the true  $\nu^*$ , as seen from the misplaced samples of  $\nu$  from the two methods (faint red dots for RD-VAE and purple squares for NERD, respectively). **Right:** We repeat the experiment but with  $\lambda = 2$ .  $\nu^*$  is now uniform on a circle with a smaller radius. The algorithms maintain their respective behavior from the  $\lambda = 10$  case, with the BA, RD-VAE, and NERD algorithms failing to recover the support of  $\nu^*$ . As  $\lambda \rightarrow 0$ ,  $\nu^*$  shrinks towards the mean of  $\mu$  (the origin in this case), making it exceedingly difficult for the BA algorithm with a randomly discretized  $\mathcal{Y}$ -space to locate the true support of  $\nu^*$ .

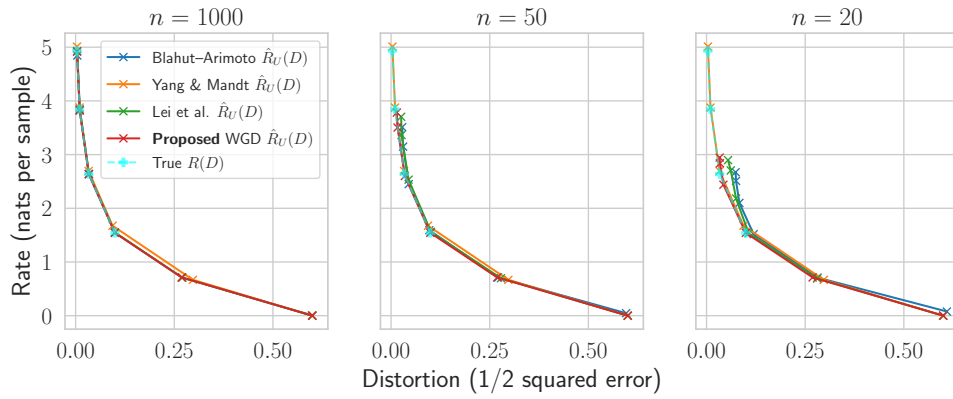

Figure 3: Final R-D upper bounds for the source  $\mu = S * \mathcal{N}(0, 0.1I)$  in the maximum-likelihood deconvolution problem (Sec. 5.2), with different settings of  $n$  for BA [Blahut, 1972, Arimoto, 1972], NERD [Lei et al., 2023], and the WGD algorithm. The result using the hybrid WGD algorithm (Sec. 4.2) overlaps with that of WGD, hence is omitted for better readability. The ground truth  $R(D)$  is known analytically for  $\lambda \geq \frac{1}{\sigma^2}$  and computed numerically (see discussion in the text), and is drawn in cyan. The RD-VAE upper bound (orange; the same in each subplot) agrees fairly well with the true  $R(D)$  except for some looseness when the distortion is between 0.1 and 0.25. **Left:** when the number of particles is large ( $n = 1000$ ), BA, WGD, and NERD give similarly R-D upper bound estimates close to the true  $R(D)$ . **Middle:** as we allow ourselves to use fewer particles, e.g.,  $n = 50$ , the bounds from BA, WGD, and NERD start to deviate from the true  $R(D)$ , with WGD appearing the least affected out of the three. **Right:** as we decrease  $n$  further to 20, WGD still mostly preserves the true  $R(D)$ , while BA and NERD shows much larger deviation.

## References

- Erhan Çinlar. *Probability and stochastics*, volume 261. Springer, 2011.
- Gerald B Folland. *Real analysis: modern techniques and their applications*, volume 40. John Wiley & Sons, 1999.
- Yury Polyanskiy and Yihong Wu. Lecture notes on information theory. *Lecture Notes for ECE563 (UIUC) and*, 6(2012-2016):7, 2014.
- David M Blei, Alp Kucukelbir, and Jon D McAuliffe. Variational inference: A review for statisticians. *Journal of the American statistical Association*, 112(518):859–877, 2017.
- MJ Beal and Z Ghahramani. The variational bayesian em algorithm for incomplete data: with application to scoring graphical model structures. *Bayesian statistics*, 7(453-464):210, 2003.
- Arthur P Dempster, Nan M Laird, and Donald B Rubin. Maximum likelihood from incomplete data via the em algorithm. *Journal of the royal statistical society: series B (methodological)*, 39(1):1–22, 1977.
- Michael I Jordan, Zoubin Ghahramani, Tommi S Jaakkola, and Lawrence K Saul. An introduction to variational methods for graphical models. *Machine learning*, 37:183–233, 1999.
- Martin J Wainwright, Michael I Jordan, et al. Graphical models, exponential families, and variational inference. *Foundations and Trends® in Machine Learning*, 1(1–2):1–305, 2008.
- Michael Irwin Jordan. *Learning in graphical models*. MIT press, 1999.
- Diederik P Kingma and Max Welling. Auto-encoding variational bayes. *arXiv preprint arXiv:1312.6114*, 2013.
- Gonzalo Mena and Jonathan Niles-Weed. Statistical bounds for entropic optimal transport: sample complexity and the central limit theorem. *Advances in Neural Information Processing Systems*, 32, 2019.
- James Bradbury, Roy Frostig, Peter Hawkins, Matthew James Johnson, Chris Leary, Dougal Maclaurin, George Necula, Adam Paszke, Jake VanderPlas, Skye Wanderman-Milne, and Qiao Zhang. JAX: composable transformations of Python+NumPy programs, 2018. URL <http://github.com/google/jax>.
- Diederik P Kingma and Jimmy Lei Ba. Adam: A method for stochastic gradient descent. In *International Conference on Learning Representations*, 2015.
- R. Blahut. Computation of channel capacity and rate-distortion functions. *IEEE Transactions on Information Theory*, 18(4):460–473, 1972. doi: 10.1109/TIT.1972.1054855.
- Suguru Arimoto. An algorithm for computing the capacity of arbitrary discrete memoryless channels. *IEEE Transactions on Information Theory*, 18(1):14–20, 1972.
- Yibo Yang and Stephan Mandt. Towards empirical sandwich bounds on the rate-distortion function. In *International Conference on Learning Representations*, 2022.
- Eric Lei, Hamed Hassani, and Shirin Saeedi Bidokhti. Neural estimation of the rate-distortion function with applications to operational source coding. *IEEE Journal on Selected Areas in Information Theory*, 2023.
